# ***Streptomyces* volatile compounds influence exploration and microbial community dynamics by altering iron availability**

*Stephanie E. Jones<sup>1</sup>, Christine A. Pham<sup>1</sup>, Joseph McKillip<sup>2</sup>, Matthew Zambri<sup>1</sup>,  
Erin E. Carlson<sup>2</sup>, Marie A. Elliot<sup>1\*</sup>*

<sup>1</sup> Department of Biology and <sup>2</sup> Michael G. DeGroote Institute for Infectious Disease Research, McMaster University, Hamilton, Ontario, Canada

<sup>2</sup> Department of Chemistry, University of Minnesota, Minneapolis, Minnesota, USA

\* Corresponding author, E-mail: [melliot@mcmaster.ca](mailto:melliot@mcmaster.ca)

# 1    **ABSTRACT**

2    Bacteria and fungi produce a wide array of volatile organic compounds (VOCs), and these can act  
3    as infochemicals or as competitive tools. Recent work has shown that the VOC trimethylamine  
4    (TMA) can promote a new form of *Streptomyces* growth, termed ‘exploration’. Here, we report  
5    that TMA also serves to alter nutrient availability in the area surrounding exploring cultures: TMA  
6    dramatically increases the environmental pH, and in doing so, reduces iron availability. This, in  
7    turn, compromised the growth of other soil bacteria and fungi. In contrast, *Streptomyces* thrives  
8    in these iron-depleted niches by secreting a suite of differentially modified siderophores, and by  
9    upregulating genes associated with siderophore uptake. Further reducing iron levels by siderophore  
10    piracy, limiting siderophore uptake, or growing cultures in the presence of iron chelators,  
11    unexpectedly enhanced exploration. Our work reveals a new role for VOCs in modulating iron levels  
12    in the environment, and implies a critical role for VOCs in modulating the behaviour of microbes and  
13    the makeup of their communities.

14  
15

# INTRODUCTION

Bacteria and fungi frequently live in densely populated multispecies communities. These microbes produce a vast array of molecules capable of modulating community dynamics, including specialized metabolites and volatile organic compounds (VOCs) (1). Soil environments are particularly complex: not only are they home to multitudes of microbes, but they are also heterogeneous systems, containing solid microenvironments and nutrient gradients connected by networks of water- and air-filled pores (2). To date, the majority of studies on interspecies competition in microbial communities have focused on the effects of specialized metabolites. These compounds effectively mediate microbial communication and competition, but their effects are limited to interactions occurring in close proximity, due to their limited diffusion capabilities. In contrast, VOCs are low-molecular-weight compounds that are capable of rapidly diffusing across water channels and air pockets, and consequently, can act as longer-range signals (3). The biological roles of VOCs are only now starting to be dissected, and initial studies are showing that they can have broad effects on both their producing organisms and their neighbours. Indeed, VOCs can alter the antibiotic resistance profiles of bacteria, act as antifungal or antibiotic compounds, promote group behaviours such as motility and biofilm formation, and induce widespread changes in the gene expression of nearby microbes (4).

One group of prolific volatile producers are the *Streptomyces* bacteria (5–7). In the soil, these bacteria are best known for their ability to produce a vast array of specialized metabolites, and for their complex, filamentous life cycle (8, 9). Recent work has, however, revealed that *Streptomyces* species also use volatile compounds to promote an alternative growth strategy known as ‘exploration’ (10, 11). In the model species *Streptomyces venezuelae*, exploration is initiated in response to the production of the VOC trimethylamine (TMA), which promotes the rapid and unrelenting spreading of explorer cells across surfaces. TMA production dramatically alters the surrounding environment, raising the pH to levels approaching 9.5, and further serves as a *Streptomyces* communication signal, inducing exploration in physically separated streptomycete colonies. TMA-mediated induction of exploration appears to be a function of its alkalinity, as other alkaline VOCs (e.g. ammonia) can induce exploration in a similar manner. TMA is also effective as a weapon against non-streptomycetes: both exploring *Streptomyces* colonies and TMA solutions reduce the survival of other soil bacteria, including *Bacillus subtilis* and *Micrococcus luteus* (11).

The effects of TMA on environmental alkalization, *Streptomyces* exploration, and the growth of other microbes suggest far-reaching effects for this VOC. How TMA affects microbial community dynamics and impacts the growth of other microbes is, however, not clear. Here, we demonstrate that TMA emitted by *Streptomyces* explorer cells reduces the survival of other soil bacteria and fungi by starving them of iron – a micronutrient that is critical for microbial growth and viability. Within these self-induced iron-depleted environments, *Streptomyces* thrive by secreting siderophores and rewiring gene expression to maximize siderophore uptake. We show that iron depletion by other microbes, or by iron chelators, can enhance *Streptomyces* exploration, revealing that low iron is a driver of exploratory growth. Taken together, our results reveal a new way in which *Streptomyces* can alter the availability of environmental iron, and in turn influence the growth and behavior of themselves and other members of the surrounding microbial communities. Our findings further suggest that iron depletion can activate a positive feedback loop that contributes to the relentless expansion of exploring cultures.

## MATERIALS AND METHODS

### *Strains, plasmids, media and culture conditions*

Strains, plasmids and primers used in this study are listed in **Table 2**. *S. venezuelae* ATCC 10712 was grown on MYM (maltose, yeast extract, malt extract) agar for spore stock generation, and for examining the behavior of classically developing cultures. Exploration was investigated on YP (yeast extract, peptone) agar or in association with yeast on YP agar supplemented with dextrose/glucose (YPD). Non-exploring controls were grown by themselves on YPD agar. For iron experiments, plates were supplemented with the indicated concentration of 2,2'-dipyridyl (0-360  $\mu$ M) or  $\text{FeCl}_3$  (0-10 mM). All strains were grown at 30°C, except those experiments involving TMA, which were conducted at room temperature in a fume hood. Prior to growing on plates, *S. venezuelae* was grown in liquid MYM at 30°C, and 5  $\mu$ L were spotted to agar plates. *Amycolatopsis* strains were also grown in liquid MYM at 30°C, and 5  $\mu$ L of the overnight culture was spotted alone or directly beside *S. venezuelae* on the surface of YP agar medium, or *S. coelicolor* M145 on the surface of R2YE agar medium. *S. coelicolor* was spotted directly from a spore stock. All plates were incubated for up to 14 days. Colony surface areas were measured using ImageJ (12). *E. coli* strains were grown in or on LB (Lysogeny Broth) medium or in SOB (super optimal broth) medium. DH5 $\alpha$  and ET12567/pUZ8002 strains were



grown at 37°C, and BW25113/pIJ790 was grown at 30°C or 37°C.

For iron growth assays, *B. subtilis* and *M. luteus* were grown in LB medium, while *S. cerevisiae* was grown in YPD medium. Each strain was grown in 10 mL liquid media shaking overnight at 30°C. To quantify strain survival in response to iron chelation on solid medium, each strain was subcultured and grown to an OD<sub>600</sub> of 0.8, before being diluted 1/5000, with 100 µL being spread on agar medium containing 0-360 µM 2,2' dipyridyl (hereafter referred to as dipyridyl). Colony numbers were quantified after 2 days. To quantify the survival of each strain in response to iron chelation in liquid medium, varying amounts of overnight cultures of each strain were added to 1.5 mL fresh media to give an OD<sub>600</sub> of 0.1 in 48-well plates. Plates were shaken at 30°C in a plate reader and OD<sub>600</sub> readings were taken every 30 min for 8 hours.

### **Identification and analysis of desferrioxamines**

To analyze metabolite production by explorer cultures, agar from each culture plate (alongside a medium control) was diced, placed in a 50 mL falcon tube, and frozen at -80°C. The cultures/agar were then dried by lyophilization. Extraction of metabolites was performed by adding 45 mL of 50:50 n-butanol/ethyl acetate to each falcon tube and rotating overnight at room temperature. The extracts were filtered, and the solvent removed under vacuum at room temperature (Genevac EZ-2 Series Personal Evaporator, method low + medium BP, lamp off).

All mass spectrometry experiments were conducted using UPLC-ESI-QTOF MS instrumentation (Agilent, 6540), as described previously (13, 14). Each extract was dissolved in 400 µL of 50:50 H<sub>2</sub>O/acetonitrile (Fisher, LC-MS grade), of which 2 µL were injected onto a C18 column (Agilent, Zorbax, 2.1 x 50 mm, 1.8 µm). Compounds were separated using a constant flow of 0.4 mL/min and the following gradient: 0-3 min at 0% B (A, 95:5:0.1%, H<sub>2</sub>O/acetonitrile(ACN)/formic acid and B, 95:5:0.1% ACN/H<sub>2</sub>O/formic acid), 3-17 min at 0-100% B, and 17-20 min at 100% B. Accurate mass data were acquired in triplicate in both profile and centroid mode with source/fragmentor voltage of 100 V, positive mode ion detection between 100–1,700 *m/z*, gas temperature of 325°C, and capillary voltage of 3,500 V. Fragmentation data were acquired with a fixed collision energy of 35 V with positive mode product ion detection between 50-1,650 *m/z*. Data were processed using Agilent Masshunter Qualitative Analysis and Origin.

109

## 110 **Construction of deletion strains and mutant complementation**

111 In-frame deletions of *sven\_4759* (*bldK* homolog) and *sven\_2570-73* (*desA-D*) were  
 112 generated using ReDirect technology (Gust et al., 2003). For each of *sven\_4759* and *desA-*  
 113 *D*, the coding sequence (from start to stop codon) was replaced with an *oriT*- containing  
 114 apramycin resistance cassette. For mutation of *sven\_5151* (a second *bldK* homolog), the gene  
 115 was disrupted in the chromosome. A 1,406-bp region of the gene was amplified and cloned into  
 116 the TOPO vector (Invitrogen). Mutant cosmids/disruption plasmids were introduced into the non-  
 117 methylating *E. coli* strain ET12567/pUZ8002 prior to conjugation into wild type *S. venezuelae*.  
 118 For creating the  $\Delta sven_4759\Delta sven_5151$  double mutant strain, the ET12567/pUZ8002 strain  
 119 carrying the *sven\_5151* TOPO construct was introduced into the  $\Delta sven_4759$ :apramycin  
 120 strain. Resulting exconjugants were screened for double-crossover recombinants (in the case  
 121 *sven\_4759 bldK* and *sven\_2570-73*) or single-crossover integration (in the case of *sven\_5151* and  
 122  $\Delta sven_4759\Delta sven_5151$ ). Correct replacement of *sven\_4759* or *sven\_2570-73*, or disruption of  
 123 the *sven\_5151* coding sequence was confirmed using diagnostic PCR combinations (see **Table 3**).  
 124 The  $\Delta sven_4759\Delta sven_5151$  double mutant phenotype was complemented using a cosmid  
 125 carrying the wild type *sven\_4759* sequence, along with the downstream cluster to account for  
 126 any polar effects. To enable effective selection for cosmid integration in the *S. venezuelae*  
 127 chromosome, the ampicillin resistance gene on the cosmid backbone was replaced with an *oriT*-  
 128 containing viomycin resistance cassette, using the ReDirect protocol (15).

129

## 130 **RNA isolation and RT-PCR analysis**

131 RNA was isolated as described previously from two replicates from each of wild type  
 132 and  $\Delta sven_4759\Delta sven_5151$  *S. venezuelae* exploring colonies grown for 8 days on YP agar plates  
 133 (we were unable to isolate high quality RNA from exploring *S. venezuelae* at later time points). For  
 134 all replicates, contaminating DNA was removed using Turbo DNase (Life Technologies), and was  
 135 confirmed to be DNA-free by PCR. RNA quality and purity were assessed using a Nanodrop  
 136 spectrophotometer. RNA integrity was further analyzed by agarose gel electrophoresis prior to  
 137 reverse transcription-PCR (RT-PCR) analysis.

138 One microgram of RNA was used as template for reverse transcription using gene-  
 139 specific primers (see **Table 3**) and Superscript III polymerase (Invitrogen), according to the

manufacturer's instructions. The resulting cDNA then served as template for PCR amplification using Taq DNA polymerase and the gene-specific primers listed in **Table 3**. The number of cycles was optimized to ensure products were detected in the linear range of amplification. Negative controls containing nuclease-free water instead of reverse transcriptase were included to ensure RNA samples and other reagents did not contain residual contaminating DNA ('no RT' control). cDNA corresponding to the gene encoding the vegetative sigma factor *hrdB* was amplified as a positive control for RNA levels and RNA integrity. Ten microliters of each PCR were separated on a 1.5% agarose gel and visualized by staining with ethidium bromide. All reactions were conducted in triplicate, using two independently isolated RNA samples.

### **Assays for volatile-mediated phenotypes**

To quantify how *S. venezuelae* VOCs affected the survival of other bacteria or fungi, *S. venezuelae* was grown in a small petri dish containing YP or YPD agar. The small dish was placed inside a larger dish containing agar or agar supplemented with 1 mM FeCl<sub>3</sub>. LB agar was used for the growth of *B. subtilis* and *M. luteus*, while YPD agar was used for *S. cerevisiae*. *S. venezuelae*-inoculated plates were grown for 10 days, after which the indicator organisms were spread on the surrounding plates. *B. subtilis*, *M. luteus*, or *S. cerevisiae* were subcultured and grown to OD<sub>600</sub> of 0.8 in liquid LB/YPD, after which the cultures were diluted 1/10,000 and 50 µL were then spread on the agar. Colony numbers on the outer plate were then quantified after 48 hours.

Measuring how iron supplementation affected the responses of microbes to TMA involved adding either 1.5 mL of commercially available TMA solutions (Sigma) diluted to 0.9 w/v, or water (negative control) to sterile plastic containers. These were then placed in a petri dish containing 50 mL LB or YPD agar, with or without 1 mM FeCl<sub>3</sub> supplementation. *B. subtilis*, *M. luteus*, or *S. cerevisiae* were subcultured and grown to an OD<sub>600</sub> of 0.8 in liquid LB/YPD before 100 µL of the subculture were spread on each plate. Plates were incubated at room temperature for 48 hours, before cells were scraped into tubes containing 2 mL liquid LB or YPD and vigorously mixed. Dilution series' were used to measure the OD<sub>600</sub> of the resulting cell suspensions. A minimum of four biological replicates were assessed, alongside two technical replicates in each instance.

# RESULTS

## *Environmental iron availability impacts the survival of bacteria and fungi*

Iron is an essential nutrient for most organisms; however, its acquisition is a major challenge. Cells use ferrous iron ( $\text{Fe}^{2+}$ ), however, iron in the environment exists predominantly in its poorly soluble ferric form ( $\text{Fe}^{3+}$ ). To facilitate iron acquisition, bacteria release iron-chelating siderophores (16). These small molecules bind ferric iron, and the resulting siderophore-iron complexes are taken back up into cells through dedicated membrane transporters, after which iron is released in its ferrous form. In alkaline environments, iron solubility drops by ~1000 fold with each unit rise in pH, due to ferric iron forming stable complexes with hydroxide ions. This further lowers iron solubility and reduces iron binding by siderophores (17–19).

*S. venezuelae* exploration requires an alkaline environment, which they create by releasing the volatile compound TMA (**Fig. S1**). TMA emission also results in dramatically decreased survival of other soil-dwelling bacteria (11). Consequently, we wondered whether low iron availability could explain the reduced survival observed for other microbes exposed to exploration-associated VOCs. To address this possibility, we first tested the extent to which low iron affected the growth of the soil bacteria *B. subtilis* and *M. luteus*, as well as the fungus *Saccharomyces cerevisiae*.

We first compared the growth of these strains on solid medium, relative to medium supplemented with the iron-specific chelator 2,2'-dipyridyl (hereafter referred to as dipyridyl) (160 or 320  $\mu\text{M}$ ). For *M. luteus*, colony numbers were equivalent on LB and on LB with 160  $\mu\text{M}$  dipyridyl, although colonies were smaller when growing on dipyridyl, suggesting that low iron slowed the growth of these organisms. With 320  $\mu\text{M}$  dipyridyl, however, no *M. luteus* colonies survived (**Fig. 1A**). In contrast, for *B. subtilis* we observed a linear growth decrease on LB medium containing dipyridyl compared with LB medium alone: on 160  $\mu\text{M}$  dipyridyl, colony numbers were reduced by ~30%, and they dropped a further 30% on 320  $\mu\text{M}$  dipyridyl (**Fig. 1A**). Finally, in the case of *S. cerevisiae*, colony numbers decreased by an average of ~40% on YPD with 160  $\mu\text{M}$  dipyridyl; on plates containing 320  $\mu\text{M}$  dipyridyl, colonies failed to grow altogether (**Fig. 1A**).

We also tested the effect of dipyridyl on the liquid culture growth of each of these organisms. Each microbe was grown in liquid medium (LB for *B. subtilis* and *M. luteus*; YPD for *S.*

*cerevisiae*), and growth was compared with that in medium supplemented with 160  $\mu$ M or 320  $\mu$ M dipyrldyl. As we saw for the solid-grown cultures, the growth rate for each strain decreased as dipyrldyl concentrations increased (**Fig. 1B**). Collectively, these experiments verified that iron was important for the growth of these microorganisms.

### ***Iron supplementation rescues microbial growth in the presence of explorer cells***

Having demonstrated that sufficient iron was essential for robust growth by *B. subtilis*, *M. luteus* and *S. cerevisiae*, we sought to test our hypothesis that the volatile compounds produced by exploring *S. venezuelae* reduced the survival of other microbes by creating an alkaline, iron-deficient environment. We set up a small petri dish of YPD agar (non-exploring medium) or YP agar (exploring medium) inside a larger dish of solid media, either alone or supplemented with additional iron. The small petri plates were inoculated with *S. venezuelae* and incubated for 10 days, after which *B. subtilis*, *M. luteus* or *S. cerevisiae* were spread on the larger, surrounding agar plates (**Fig. 2A**). Growth of each indicator microbe was assessed after 2 days. When grown adjacent to either YP plates without *Streptomyces* inoculum or to non-exploring *S. venezuelae* cultures on YPD medium, colony numbers for each microbe were similar on all plates, irrespective of iron supplementation (**Fig. 2B**). As extra iron did not enhance growth, it suggested that iron was unlikely to be limiting for the growth of these organisms under these conditions.

In contrast, when these microbes were grown next to exploring *S. venezuelae* on YP medium, colony numbers on the surrounding agar plates differed drastically depending on the iron supplementation status. Growing *B. subtilis*, *M. luteus* and *S. cerevisiae* adjacent to exploring *S. venezuelae* on medium without added iron led to a reduction in colony numbers by an average of 32%, 63%, and 100%, respectively, relative to controls (those grown on plates adjacent to blank YP or non-exploring *S. venezuelae* on YPD) (**Fig. 2B**). In each case, growth was partially (*M. luteus* and *S. cerevisiae*) or fully (*B. subtilis*) restored by iron supplementation (**Fig. 2B**). These data suggest that the alkaline environments created by exploring *S. venezuelae* reduced the viability of other soil microbes, at least in part by starving them of iron.

To determine whether this was a TMA-dependent phenomenon, or whether it was due to other volatiles produced by exploring *Streptomyces*, we set up equivalent assays where *S. venezuelae* colonies were replaced with water or TMA (11) (**Fig. 2C**). Around these water/TMA-

containing wells were spread the three indicator organisms on agar medium, with or without iron supplementation. We quantified their growth after 2 days. For each microbe, the addition of iron had little impact on cell survival when cultures were grown next to water-containing wells (**Fig. 2C**): *B. subtilis* growth was unaffected, while there was a slight increase in growth observed for *M. luteus* and a slight decrease for *S. cerevisiae*.

In contrast, iron supplementation had a significant effect on survival and growth when cells were plated adjacent to TMA-containing wells. Exposure of *B. subtilis*, *M. luteus* and *S. cerevisiae* to TMA during growth on plates without iron supplementation led to reduced growth/survival of these strains by 42%, 21%, and 35% respectively (on average), compared with those grown on plates adjacent to water wells (**Fig. 2C**). As seen for the exploring culture experiments above, iron supplementation restored the growth of TMA-exposed cultures to levels equivalent to those around the water wells (**Fig. 2C**). This indicated that TMA emission by exploring *S. venezuelae* functioned to inhibit the growth of other microbes by limiting iron availability. It appears, however, that either exploring *S. venezuelae* produce more TMA than we were using in these assays, or additional volatile compounds also influence the growth of yeast, and to a lesser extent *M. luteus*, as the growth of these organisms was more strongly impacted by exploring *S. venezuelae*, than by TMA exposure.

### ***Desferrioxamines are produced during exploration***

As iron supplementation could restore the growth of other microbes in the presence of TMA/*Streptomyces* volatile compounds, this suggested that these volatile compounds were responsible for creating a low-iron environment. This then raised the question of how exploring *S. venezuelae* dealt with these low iron conditions. To begin addressing this point, we examined the metabolic output of exploring cultures. Using liquid chromatography coupled with mass spectrometry (LC-MS), we compared the metabolites produced by exploring cultures (both *S. venezuelae* grown alone on YP medium and beside *S. cerevisiae* on YPD medium) versus non-exploring colonies (*S. venezuelae* grown alone on YPD or MYM medium) (**Fig. 3A-D**). We found that all exploring cultures produced analogs of the desferrioxamine or ferrioxamine (iron-complexed desferrioxamine) siderophore, including ferrioxamine B, D, and an aryl-functionalized ferrioxamine (**Fig. 3A-C**). Colonies exploring beside *S. cerevisiae* on YPD also produced the unusual ferrioxamine B+CH<sub>2</sub>, reported previously by Cruz-Morales *et al.* (36) (**Fig. 3D**). Importantly,



ferrioxamines were not detected in non-exploring cultures, nor were they produced by *S. cerevisiae*, suggesting that siderophore production was specific to exploring *S. venezuelae* cultures under these growth conditions.

In parallel, we revisited our previously generated RNA-seq data (11), to determine whether exploring cultures were generally exhibiting a transcriptional profile consistent with iron starvation. While the regulation of iron homeostasis has not been studied in *S. venezuelae*, investigations in the closely related *Streptomyces coelicolor* have revealed that the desferrioxamine biosynthetic gene cluster (*desABCD*) is controlled by the iron-responsive regulator DesR/DmdR (20). DesR/DmdR binds to a site overlapping the -10 promoter region upstream of *desA*, repressing the expression of the *des* genes when iron is abundant. In iron-deficient conditions, transcription repression is alleviated, and transcription of the *des* operon increases as a result (20). It appears that a similar situation exists in *S. venezuelae*, which encodes a DesR/DmdR homologue (SVEN\_4209) sharing 92% sequence identity (96% sequence similarity) with the *S. coelicolor* protein, and has a similar 'iron box' overlapping the promoter of the *des* operon (Fig. S2).

Unexpectedly, we found that *desABCD* (*sven\_2570-73*) transcript levels were not upregulated in exploring cultures relative to static cultures (Fig. 3E). This suggested that exploring cultures were not exhibiting a traditional iron-starvation response. Furthermore, it implied that there must be some, as yet unknown, post-transcriptional regulatory mechanism functioning to enhance desferrioxamine production. It is worth noting that transcript levels for the genes flanking the *des* operon were significantly increased under exploring conditions (Fig. 3E), although it is not clear what role these gene products play in desferrioxamine synthesis.

### **Oligopeptide transporters influence exploration and culture response to iron**

Upon further analysis of our RNA-seq data, we observed that two of the most highly upregulated gene clusters in exploring cultures (*sven\_5150-53* and *sven\_4759-63*) encoded ATP-binding cassette (ABC) transporter systems (Fig. 4A). The closest characterized homologues to these genes in the model *S. coelicolor* system were in the *bldK* locus (*sco5112-16*). Recent work has suggested that BldK transporters function in ferrioxamine siderophore uptake (21). Increased expression for these two *bldK*-like transporter gene clusters in *S. venezuelae* implied that exploring cultures may adapt to alkaline, low-iron environments by coupling increased desferrioxamine production with enhanced ferrioxamine uptake.

295 We searched for other genes in *S. venezuelae* that were homologous to the *S. coelicolor*  
 296 *bldK* locus, and found *S. venezuelae* encoded seven additional *bldK*-like clusters (**Fig. 4A**). Of  
 297 these, three were not expressed in exploring cultures or static cultures (*sven\_7098-02*,  
 298 *sven\_7135-39*, *sven\_7154-58*); three were expressed at low levels in both exploring and static  
 299 cultures (*sven\_4765-69*, *sven\_4820-23*, *sven\_5369-73*); and one was expressed at intermediate  
 300 levels in exploring cultures, but was only modestly (~1.7 fold) upregulated in exploring versus  
 301 static cultures and is predicted to function in nickel transport (*sven\_6981-85*) (22) (**Fig. 4A**). Thus,  
 302 we focused our attention on the two highly expressed *sven\_5150-53* and *sven\_4759-63* clusters, in  
 303 assessing their contributions to exploration and low iron adaptation.

304 To test whether the activity of these transporters affected exploration, we constructed  
 305 mutations in key genes within each of the two upregulated *bldK*-like gene clusters (*sven\_4759* and  
 306 *sven\_5151*). To account for the possibility of functional redundancy shared by these two  
 307 transporters, we also created a double (*sven\_4759/sven\_5151*) mutant strain. We found that the  
 308 single mutant strains each behaved like wild type on YP (exploration-promoting) medium (**Fig.**  
 309 **S3**). However, the surface area of the double mutant was significantly larger (approximately three  
 310 times greater) compared with wild type (**Fig. 5A,B**). This suggested that *sven\_4759* and *sven\_5151*  
 311 were functionally redundant, and that their collective activity profoundly influenced exploration.  
 312 The enhanced exploration capabilities observed for the double mutant could be reduced to  
 313 wild type levels by complementing with a cosmid carrying an intact *sven\_4759-63* operon (**Fig.**  
 314 **S4**).

315 These transporters were predicted to function in the uptake of iron-complexed  
 316 siderophores, and their loss enhanced exploration. This led us to test whether low iron levels could  
 317 generally enhance exploration. We grew wild type *S. venezuelae* on YP medium supplemented  
 318 with increasing concentrations of the dipyriddy iron-chelator. On medium containing 160  $\mu$ M  
 319 dipyriddy, the surface area of exploring *S. venezuelae* was 2.7 times larger on average than that of  
 320 colonies grown without chelator (**Fig. 5A,B**). This was consistent with the effect that we observed  
 321 for the transporter mutants (on YP without dipyriddy), supporting our proposal that these  
 322 transporters were involved in iron acquisition. Doubling the chelator concentration, however,  
 323 resulted in wild type explorer colony sizes that were slightly smaller than seen in the absence of  
 324 chelator, suggesting that there was a threshold level of iron required to promote robust  
 325 exploration.



These observations prompted us to create a desferrioxamine mutant strain ( $\Delta desABCD$ ). We expected to see increased exploration for this mutant, as we had for the transporter mutant. Instead, we observed reduced exploration for the *des* mutant relative to wild type (**Fig. 5A,B**), suggesting that iron uptake by this strain may fall below the threshold needed for efficient exploration.

In an effort to reconcile the conflicting phenotypic observations for the transporter and *desABCD* mutant strains, we wanted to determine whether the expression of other siderophore clusters or transporters were altered in these strains, relative to each other and to wild type. We isolated RNA from each strain after 8 days of exploration, and analyzed the expression profiles of genes predicted to direct siderophore production and uptake in these strains using semi-quantitative RT-PCR. *S. venezuelae* encodes five predicted siderophore biosynthetic clusters (as predicted by antiSMASH, see **Table 1**) (23). Transcript levels associated with genes in the desferrioxamine biosynthetic cluster (*sven\_2568* and *sven\_2470/desA*) were higher in the double transporter mutant compared to wild type (**Fig. 5C**), consistent with what has been observed previously for *bldK* mutants in *S. coelicolor* (21). In contrast, genes in the other four siderophore-encoding biosynthetic clusters were unaltered in wild type and transporter mutant strains (**Fig. 5D**). Interestingly, the *desABCD* mutant exhibited reduced expression of several other transporter genes and siderophore biosynthetic clusters when compared with wild type and the transporter mutant strains (**Fig. 5C**). This altered expression may serve to further magnify the iron uptake defects of this strain, and explain its reduced capacity to explore.

We also examined the expression of the other *bldK*-like genes in the double transporter mutant strain, to determine whether any of these might be upregulated, such that their products could compensate for the loss of the two transporters. We found that transcription of genes in most clusters was undetectable, with the exception of the *sven\_6981*-containing cluster, which was unchanged between wild type and mutant, and the *sven\_5373*-containing cluster, whose expression was upregulated in the double mutant background (**Fig. 5D**). We speculate that the transporter encoded by this cluster may facilitate low-level ferrioxamine-uptake in the absence of the two primary transporters, ensuring sufficient intracellular iron levels for robust exploration to occur.

Finally, we sought to understand more about the mechanism underlying the increased exploration colony size observed for the siderophore transporter mutant and the wild type strain

growing under low iron conditions. We reasoned that the larger surface area observed for these strains, relative to wild type grown without chelator, could be due to enhanced exploration, or it could be a result of increased growth. To differentiate between these possibilities, we grew wild type *S. venezuelae* for 15 hours in YP liquid medium, with or without the dipyrindyl chelator. We found that chelator supplementation led to generally reduced *S. venezuelae* growth (Fig. 5E). This suggested that the enhanced exploration observed for the wild type strain growing on 160  $\mu$ M dipyrindyl, as well as the transporter mutant strain, was most likely the result of increased colony expansion, and not more rapid growth.

### ***Low iron environments can be created by interspecies interactions***

*Streptomyces* live alongside many other bacteria and fungi in the soil where there is intense competition for key nutrients, including iron. Given that low iron both reduced the survival of other microbes and enhanced exploration, we wondered how microbial competition for iron would impact *S. venezuelae* exploration. We focused our attention on interactions between *Streptomyces* and *Amycolatopsis* bacteria. These bacteria have been isolated from the same soil samples, suggesting that they may well interact in the environment (24). Furthermore, previous work has demonstrated that *Amycolatopsis* sp. AA4 can pirate desferrioxamine E from *S. coelicolor* in low iron environments, with this iron sequestration also inhibiting the aerial development of *S. coelicolor* (24, 25). We recapitulated this experiment using *Amycolatopsis orientalis* sp. *lurida* and observed the same defect in aerial development for *S. coelicolor*, suggesting that this species can also sequester *Streptomyces* siderophores (Fig. S6).

We next tested whether such siderophore piracy could affect *S. venezuelae* exploration. We grew *S. venezuelae* beside *A. orientalis*, as described above for *S. coelicolor*, on either YP agar or YP supplemented with dipyrindyl. Following a 7 day incubation, we found the surface area of *S. venezuelae* had increased by >100% when grown beside *A. orientalis* on YP agar without chelator (Fig. 6). This was analogous to the growth of *S. venezuelae* alone on YP medium supplemented with moderate concentrations (160  $\mu$ M) of chelator (Fig. 6). Interestingly, combining proximal *A. orientalis* with further iron sequestration (through the addition of 160 or 320  $\mu$ M dipyrindyl) led to a decrease (14% and 76%, respectively) in the surface area of exploring *S. venezuelae*, suggesting that iron levels under these conditions were below the threshold required for optimal exploration.

Our results suggested that *A. orientalis* promoted increased *S. venezuelae* exploration in the same way as low iron growth conditions. To test this hypothesis, we inoculated *S. venezuelae* beside *A. orientalis* on YP medium supplemented with increasing concentrations of FeCl<sub>3</sub> for 7 days (Fig. 6). For the different FeCl<sub>3</sub> concentrations tested, the surface area of *S. venezuelae* was nearly identical when grown alone or beside *A. orientalis*. This indicated that the exploration-promoting effects of *A. orientalis* could be suppressed by excess iron, implying that iron sequestration by *A. orientalis* was responsible for enhancing *S. venezuelae* exploration.

### **Glucose trumps iron in the hierarchy of nutrients affecting exploration**

Our results to this point suggested that low iron levels, irrespective of whether this was due to VOC-mediated alkalinization, iron uptake defects, or siderophore sequestration, resulted in enhanced exploration. This led us to question whether low iron could overcome the exploration-inhibitory effects observed for other nutrients. Previous work revealed that exploration was glucose-repressible (11), and thus we wanted to determine whether low iron conditions could alleviate the need for a low-glucose environment. We grew *S. venezuelae* and the  $\Delta sven\_4759\Delta sven\_5151$  double mutant strain on YP plus glucose (YPD) plates supplemented with 160  $\mu$ M or 320  $\mu$ M of the dipyriddy iron chelator for 10 days. We found that *S. venezuelae* failed to explore under these conditions (Fig. S7). This indicated that the presence of glucose was sufficient to override the effects of iron deficiency, with respect to exploration promotion.

We also tested whether additional iron could inhibit exploration. We grew wild type *S. venezuelae* on YP medium (exploration-promoting medium) and MYM medium (classic development-promoting medium) with increasing concentrations of iron (Fig. 7). *S. venezuelae* explored on YP with iron levels ranging from 0-10 mM, although the surface area was reduced slightly at the highest iron levels when compared to strains grown without added iron. Notably, *S. venezuelae* failed to grow on MYM medium when iron levels exceeded 2.5 mM, but exploring cultures remained viable when growing on concentrations at least four times that. This raised the interesting possibility that exploration could also protect *S. venezuelae* from otherwise toxic levels of iron in their environment by reducing the amount of bioavailable iron through environmental alkalinization.

## **DISCUSSION**

Our work here reveals a new role for bacterial VOCs in modulating nutrient availability and microbial community behaviour, and expands the repertoire of interspecies interactions that can impact exploration. We show the release of TMA by *Streptomyces* explorer cells dramatically alters the pH of their surrounding environment, and in doing so, reduces the survival of nearby soil microbes by starving them of iron. Within these iron-depleted niches, exploration is enhanced and *Streptomyces* ensure maximal iron uptake by secreting siderophores, and upregulating genes encoding putative desferrioxamine transport systems. Collectively, our results reveal exploration to be not only an effective mechanism for dealing with competition for iron and iron toxicity, but also a potent mediator of nutrient availability in the environment.

### ***Volatile compounds impact microbial community dynamics by controlling nutrient availability***

*Streptomyces* exploration is coordinated by the volatile molecule TMA, whose release raises the pH of the surrounding environment (11). Remarkably, TMA functions as both a communication signal, inducing other *Streptomyces* to explore, and as a competitive weapon, reducing the survival of other microbes. The antibacterial and antifungal properties of TMA appear to be tied to its nutrient modulatory effects. Alkaline conditions create an inhospitable environment for many microbes by reducing the levels of bioavailable iron (17, 18, 26). We show that iron supplementation can restore the growth of otherwise susceptible bacteria and fungi in the presence of TMA, suggesting that iron starvation is at the heart of the TMA antimicrobial effects.

Microbes can modify their environment through nutrient depletion, or metabolite excretion, and in doing so, can impact the growth and dynamics of their surrounding community members. Increasingly, volatile compounds are being recognized as important contributors to soil nutrient status. For example, microbial volatiles can generally impact carbon dynamics in the soil (27). Species-specific volatiles have also been shown to enhance the availability of reduced sulfur, which in turn promotes the growth of sulfur-deficient plants (28). We can now add volatile-induced iron starvation through increased environmental pH to the effects ascribed to microbial volatiles.

### ***Promoting exploration in iron-depleted environments***

*Streptomyces* exploration is enhanced during growth in low iron environments, although

below a certain level, exploration stimulation ceases. Iron is limited in the soil (24, 29). Exploratory growth in iron-limited environments could allow *Streptomyces* to access nutrients in more distant locations. We have determined that exploration is both rapid and remarkably processive; explorer cells spread over surfaces at a rate that is ~12 times faster than has been seen previously for *Streptomyces* colonies (11), and it is not yet known how exploration is stopped. Our data suggest the relentless nature of exploration could be explained by a positive feedback loop, with iron acting as a central player: explorer cells produce TMA, TMA emission leads to increased pH and reduced iron availability, explorer cells spread more to get more iron, TMA continues to be produced, and the cycle continues (**Fig. 8**). Indeed, a recent study modeling the effects of pH on bacterial growth demonstrated that when environmental modification is beneficial for a bacterium, there is a positive feedback on their growth: the more they change the environmental pH, the more cells grow, and the more they can continue to alter pH (26).

Within the exploration feedback cycle, several additional factors could account for the increase in exploration surface area in low iron environments. The classic *Streptomyces* life cycle involves a transition from vegetative hyphal growth to raising reproductive aerial structures. For *S. coelicolor*, the addition of iron chelators to the growth medium prevents colonies from raising aerial hyphae or sporulating, and instead locks cells in the vegetative growth phase (24). Explorer cells share many properties with vegetative hyphae (11), and it is possible that reduced iron availability helps to inhibit aerial development, thereby enhancing the rate of exploration by preventing entry into the classical reproductive differentiation phase.

We also noted that colonies growing on YP supplemented with the dipyriddy chelator, or in association with *A. orientalis*, were much flatter and less structured than colonies growing alone on YP. Other bacteria (e.g. *P. aeruginosa*), require iron for biofilm assembly: low iron triggers increased surfactant production and motility, which in turn reduces biofilm structure (30, 31). Similar connections between iron availability and motility have been made in other microbes (32–35). *Streptomyces* exploration is phenotypically similar to sliding motility – a form of passive motility driven by growth and facilitated by the release of a surfactant. It is possible that low iron enhances surfactant production by explorer cells. This in turn could alter colony architecture and promote greater motility, while at the same time increase the colony's ability to scavenge for iron.

How *Streptomyces* sense low iron levels during exploration remains unexplained. It does not appear to be mediated by the major iron repressor DesR/DmdR, as expression of the *des* cluster, a known regulon member in other streptomycetes, is unaltered during exploration. It is also not clear what controls the expression of the two transporter-encoding clusters, as these do not have an 'iron box' present in their promoter regions. It will be interesting to determine whether this response is coupled with pH-sensing, given the profound effect of high pH on iron availability.

### ***Interspecies effects on Streptomyces metabolism and exploration***

*Streptomyces* exploration was initially discovered as a response to co-incubation with the yeast *S. cerevisiae*. Specifically, *S. cerevisiae* served to deplete glucose from the medium, and it was this change in carbon source availability that promoted the onset of exploration. We show here that other organisms capable of 'stealing' siderophores, such as *Amycolatopsis*, can also influence the rate of exploration. Intriguingly, *S. venezuelae* secretes a suite of differentially modified siderophores during exploration, including unusual molecules for which there is only one report in the literature (36). It will be interesting to determine whether some of these molecules are more amenable for uptake by *S. venezuelae* than by other organisms, and whether these modified compounds provide resistance against siderophore cheaters. Alternatively, the high pH environment may promote differential siderophore tailoring, as has been noted for marine microbes that produce more amphiphilic ferrioxamines (37). In exploring *S. venezuelae*, this may be the result of increased expression of the genes flanking the core *desABCD* operon, and/or the effect of modulating the availability of different precursors.

Collectively, our work reveals that exploring *Streptomyces* colonies can alter nutrient availability through volatile compound emission, and that this activates a positive feedback cycle that promotes continued exploration. This nutrient modulation further drives changes in the dynamics and composition of the local microbial community.

### **REFERENCES**

1. Westhoff S, van Wezel G, Rozen D. Distance dependent danger responses in bacteria. *Curr*



- 514 *Opin Microbiol* 2017; **36**: 95–101.
- 515 2. Bauer E, Zimmermann J, Baldini F, Thiele I, Kaleta C. BacArena : Individual-based metabolic  
516 modeling of heterogeneous microbes in complex communities. *PLoS Comput Biol* 2017; **13**:  
517 1–22.
- 518 3. Schmidt R, Etalo DW, de Jager V, Gerards S, Zweers H, de Boer W, Garbeva P. microbial small  
519 talk: volatiles in fungal-bacterial interactions. *Front Microbiol* 2016; **6**: 1495.
- 520 4. Avalos M, van Wezel GP, Raaijmakers JM, Garbeva P. Healthy scents: microbial volatiles as  
521 new frontier in antibiotic research? *Curr Opin Microbiol* 2018; **45**: 84–91.
- 522 5. Jones SE, Elliot MA. *Streptomyces* exploration: competition, volatile communication and new  
523 bacterial behaviours. *Trends Microbiol* 2017; **25**: 1–10.
- 524 6. Schmidt R, Cordovez V, de Boer W, Raaijmakers J, Garbeva P. Volatile affairs in microbial  
525 interactions. *ISME J* 2015; **42**: 1–7.
- 526 7. Schöller C, Gurtler H, Pedersen R, Molin S, Wilkins K. Volatile metabolites from  
527 actinomycetes. *J Agric Food Technol* 2002; **50**: 2615–2621.
- 528 8. Elliot MA, Buttner MJ, Nodwell JR. 2008. Multicellular development in *Streptomyces*. In  
529 Whitworth, D. *Myxobacteria: Multicellularity and Differentiation*. ASM Press, USA, 2008, pp  
530 419–439.
- 531 9. Hopwood DA. *Streptomyces in nature and medicine: the antibiotic makers*. Oxford University  
532 Press, UK, 2007.
- 533 10. Jones SE, Elliot MA. ‘Exploring’ the regulation of *Streptomyces* growth and development.  
534 *Curr Opin Microbiol* 2018; **42**: 25–30.
- 535 11. Jones SE, Ho L, Rees CA, Hill JE, Nodwell JR, Elliot MA. *Streptomyces* exploration is triggered  
536 by fungal interactions and volatile signals. *eLife* 2017; **6**: 1–21.
- 537 12. Abràmoff MD, Hospitals I, Magalhães PJ. Image processing with ImageJ. *Biophotonics Int*  
538 2004; **11**: 33–42.
- 539 13. Sidebottom AM, Johnson AR, Karty JA, Trader DJ, Carlson EE. Integrated metabolomics  
540 approach facilitates discovery of an unpredicted natural product suite from *Streptomyces*  
541 *coelicolor* M145. *ACS Chem Biol* 2013; **8**: 2009–2016.
- 542 14. Sidebottom AM, Karty JA, Carlson EE. Accurate mass MS/MS/MS analysis of siderophores  
543 ferrioxamine B and E1 by collision-induced dissociation electrospray mass spectrometry. *J*  
544 *Am Soc Mass Spectrom* 2015; **26**: 1899–1902.
- 545 15. Gust B, Challis GL, Fowler K, Kieser T, Chater KF. PCR-targeted *Streptomyces* gene  
546 replacement identifies a protein domain needed for biosynthesis of the sesquiterpene soil  
547 odor geosmin. *Proc Natl Acad Sci U S A* 2003; **100**: 1541–1546.
- 548 16. Ahmed E, Holmström SJM. Siderophores in environmental research: roles and applications.  
549 *Microb Biotechnol* 2014; **7**: 196–208.
- 550 17. McMillan DGG, Velasquez I, Nunn BL, Goodlett DR, Hunter KA, Lamont I, Sander SG, Cook  
551 GM. Acquisition of iron by alkaliphilic *Bacillus* species. *Appl Environ Microbiol* 2010; **76**:  
552 6955–6961.
- 553 18. Serrano R, Bernal D, Simón E, Ariño J. Copper and iron are the limiting factors for growth of  
554 the yeast *Saccharomyces cerevisiae* in an alkaline environment. *J Biol Chem* 2004; **279**:  
555 19698–19704.
- 556 19. Shaddox TW, Unruh JB, Kruse JK, Restuccia NG. Solubility of iron, manganese, and  
557 magnesium sulfates and glucoheptonates in two alkaline soils. *Soil Sci Soc Am J* 2016; **80**:  
558 765–770.
- 559 20. Tunca S, Barreiro C, Sola-Landa A, Coque JJR, Martín JF. Transcriptional regulation of the  
560 desferrioxamine gene cluster of *Streptomyces coelicolor* is mediated by binding of DmdR1 to

- 561 an iron box in the promoter of the *desA* gene. *FEBS J* 2007; **274**: 1110–1122.
- 562 21. Lambert S, Traxler MF, Craig M, Maciejewska M, Ongena M, van Wezel GP, Kolter R, Rigali S.  
563 Altered desferrioxamine-mediated iron utilization is a common trait of bald mutants of  
564 *Streptomyces coelicolor*. *Met Integr Biometal Sci* 2014; **6**: 1390–1399.
- 565 22. Ahn BE, Cha J, Lee EJ, Han AR, Thompson CJ, Roe JH. Nur, a nickel-responsive regulator of  
566 the Fur family, regulates superoxide dismutases and nickel transport in *Streptomyces*  
567 *coelicolor*. *Mol Microbiol* 2006; **59**: 1848–1858.
- 568 23. Blin K, Medema MH, Kazempour D, Fischbach MA, Breitling R, Takano E, Weber T.  
569 antiSMASH 2.0--a versatile platform for genome mining of secondary metabolite producers.  
570 *Nucleic Acids Res* 2013; **41**: W204–212.
- 571 24. Traxler MF, Seyedsayamdost MR, Clardy J, Kolter R. Interspecies modulation of bacterial  
572 development through iron competition and siderophore piracy. *Mol Microbiol* 2012; **86**:  
573 628–44.
- 574 25. Traxler MF, Watrous JD. Interspecies interactions stimulate diversification of the  
575 *Streptomyces coelicolor* secreted metabolome. *mBio* 2013; **4**: 1–12.
- 576 26. Ratzke C, Gore J. Modifying and reacting to the environmental pH can drive bacterial  
577 interactions. *PLoS Biol* 2018; **16**: 1–20.
- 578 27. Ramirez K, Lauber CL, Fierer N. Microbial consumption and production of volatile organic  
579 compounds at the soil-litter interface. *Biogeochem* 2010; **99**: 97–107.
- 580 28. Meldau DG, Meldau S, Hoang LH, Underberg S, Wunsche H, Baldwin IT. Dimethyl disulfide  
581 produced by the naturally associated bacterium *Bacillus* sp B55 promotes *Nicotiana*  
582 *attenuata* growth by enhancing sulfur nutrition. *Plant Cell* 2013; **25**: 2731–2747.
- 583 29. Niehus R, Picot A, Oliveira NM, Mitri S, Foster KR. The evolution of siderophore production  
584 as a competitive trait. *Evolution* 2017; **71**: 1443–1455.
- 585 30. Banin E, Vasil ML, Greenberg EP. Iron and *Pseudomonas aeruginosa* biofilm formation. *Proc*  
586 *Natl Acad Sci U S A* 2005; **102**: 11076–11081.
- 587 31. Glick R, Gilmour C, Tremblay J, Satanower S, Avidan O, Déziel E, Greenberg EP, Poole K,  
588 Banin E. Increase in rhamnolipid synthesis under iron-limiting conditions influences surface  
589 motility and biofilm formation in *Pseudomonas aeruginosa*. *J Bacteriol* 2010; **192**: 2973–80.
- 590 32. Burbank L, Mohammadi M, Roper MC. Siderophore-mediated iron acquisition influences  
591 motility and is required for full virulence of the xylem-dwelling bacterial phytopathogen  
592 *Pantoea stewartii* subsp. *stewartii*. *Appl Environ Microbiol* 2015; **81**:139–148.
- 593 33. Helmann JD. Specificity of metal sensing: iron and manganese homeostasis in *Bacillus*  
594 *subtilis*. *J Biol Chem* 2014; **289**: 28112–28120.
- 595 34. Ojha A, Hatfull GF. The role of iron in *Mycobacterium smegmatis* biofilm formation: the  
596 exochelin siderophore is essential in limiting iron conditions for biofilm formation but not for  
597 planktonic growth. *Mol Microbiol* 2007; **66**: 468–483.
- 598 35. Pelchovich G, Omer-Bendori S, Gophna U. Menaquinone and iron are essential for complex  
599 colony development in *Bacillus subtilis*. *PLoS One* 2013; **8**: 1–14.
- 600 36. Cruz-Morales P, Ramos-Aboites HE, Licona-Cassani C, Selem-Mójica N, Mejía-Ponce PM,  
601 Souza-Saldívar V, Barona-Gómez F. *Actinobacteria* phylogenomics, selective isolation from  
602 an iron oligotrophic environment and siderophore functional characterization, unveil new  
603 desferrioxamine traits. *FEMS Microbiol Ecol* 2017; **93**: 1–12.
- 604 37. Boiteau RM, Mende DR, Hawco NJ, McIlvin MR, Fitzsimmons JN, Saito MA, Sedwick PN,  
605 DeLong EF, Repeta DJ. Siderophore-based microbial adaptations to iron scarcity across the  
606 eastern Pacific Ocean. *Proc Natl Acad Sci U S A* 2016; **113**: 14237–14242.
- 607 38. Kieser T, Bibb MJ, Buttner MJ, Chater KF, Hopwood DA. Practical *Streptomyces* genetics. The



608 John Innes Foundation, Norwich, UK, 2000.

609 39. MacNeil DJ, Gewain KM, Ruby CL, Dezeny G, Gibbons PH, MacNeil T. Analysis of

610 *Streptomyces avermitilis* genes required for avermectin biosynthesis utilizing a novel inte-

611 gration vector. *Gene* 1992; **111**: 61–68.

612 40. Paget MS, Chamberlin L, Atrih A, Foster SJ, Buttner MJ. Evidence that the extracytoplasmic

613 function sigma factor *sigmaE* is required for normal cell wall structure in *Streptomyces*

614 *coelicolor* A3(2). *J Bacteriol* 1999; **181**: 204–11.

615

616

617

## TABLES

**Table 1. *S. venezuelae* siderophore production and uptake genes**

| Genes                       |                                         |
|-----------------------------|-----------------------------------------|
| <b>Synthesis clusters</b>   | <b>Predicted siderophore</b>            |
| <i>sven_0503-17</i>         | Thiazostatin                            |
| <i>sven_2566-77</i>         | Desferrioxamine                         |
| <i>sven_5413-26</i>         | Unknown siderophore                     |
| <i>sven_5472-82</i>         | Rhizobactin-like cyptic siderophore     |
| <i>sven_7032-80</i>         | Coelichelin                             |
|                             |                                         |
| <b>Uptake systems</b>       | <b>Annotation</b>                       |
| <b><i>bldK</i> homologs</b> |                                         |
| <i>sven_4759-63</i>         |                                         |
| <i>sven_5150-54</i>         |                                         |
| <i>sven_4765-69</i>         |                                         |
| <i>sven_4820-23</i>         |                                         |
| <i>sven_5369-73</i>         |                                         |
| <i>sven_6981-85</i>         |                                         |
| <i>sven_7098-02</i>         |                                         |
| <i>sven_7135-39</i>         |                                         |
| <i>sven_7154-58</i>         |                                         |
| <b>other</b>                |                                         |
| <i>sven_0776-78</i>         | Salmycin transporter CdtABC             |
| <i>sven_0164-66</i>         | Putative siderophore transporter system |
| <i>sven_1997</i>            | Putative iron-siderophore uptake system |
| <i>sven_1954-57</i>         | Ferrous iron transport system EfeUOB    |

**Table 2. Bacterial strains and plasmids**

| Strain                                    | Genotype, description, or use                                                 | Reference or source  |
|-------------------------------------------|-------------------------------------------------------------------------------|----------------------|
| <b><i>Streptomyces</i></b>                |                                                                               |                      |
| <i>Streptomyces venezuelae</i> ATTC 10712 |                                                                               | Gift from M. Buttner |
| E329                                      | ATTC 10712 $\Delta$ SVEN_4759::[aac(3)IV-oriT]                                | This work            |
| E330                                      | ATTC 10712 $\Delta$ SVEN_5151::TOPO 2.1                                       | This work            |
| E330                                      | ATTC 10712 $\Delta$ SVEN_4759::[aac(3)IV-oriT] + $\Delta$ SVEN_5151::TOPO 2.1 | This work            |
| E331                                      | ATTC 10712 $\Delta$ SVEN_2570-73::[aac(3)IV-oriT]                             | This work            |
| <i>Streptomyces coelicolor</i> M145       |                                                                               | (38)                 |
|                                           |                                                                               |                      |
| <b><i>Amycolatopsis</i></b>               |                                                                               |                      |

|                                                      |                                                                                     |                                  |
|------------------------------------------------------|-------------------------------------------------------------------------------------|----------------------------------|
| <i>Amycolatopsis orientalis</i><br><i>sp. lurida</i> |                                                                                     | Gift from G. Wright              |
| <i>E. coli</i>                                       |                                                                                     |                                  |
| DH5α                                                 | Plasmid construction and general subcloning                                         | Invitrogen                       |
| ET12567/pUZ8002                                      | Generation of methylation-free plasmid DNA and conjugation into <i>Streptomyces</i> | (39, 40)                         |
| BW25113/pIJ790                                       | Mutations in cosmid DNA                                                             | (15)                             |
| <b>Plasmids or cosmids</b>                           |                                                                                     |                                  |
| 3D02                                                 | <i>S. venezuelae</i> cosmid carrying <i>SVEN_4759</i>                               | Gift from M. Bibb and M. Buttner |
| 5-E05                                                | <i>S. venezuelae</i> cosmid carrying <i>SVEN_2570-73</i>                            | Gift from M. Bibb and M. Buttner |
| TOPO 2.1                                             | Plasmid used for disruption of <i>SVEN_5151</i>                                     | Invitrogen                       |
| pIJ790                                               | Temperature-sensitive plasmid carrying λ-RED genes                                  | (15)                             |
| pIJ773                                               | Plasmid carrying the apramycin knockout cassette                                    | (15)                             |
| pIJ10701                                             | Plasmid carrying the <i>hyg-oriT</i> cassette                                       | (15)                             |
| pIJ780                                               | Plasmid carrying the <i>vio-oriT</i> cassette                                       | (15)                             |

**Table 3. Oligonucleotides used in this study**

| Name                | Sequence (5' to 3')                                             | Use                                                          |
|---------------------|-----------------------------------------------------------------|--------------------------------------------------------------|
| SVEN4759<br>Fwd     | CTTGTAGTGACAAAGTGGACTCATGAGGAG<br>GAACCCATGATTCCGGGGATCCGTCGACC | Creating and confirming the Δ4759 mutation                   |
| SVEN4759<br>Rev     | TCAGCCCCGCATCGCAGGCGGACTACGCTTG<br>GGTGATTATGTAGGCTGGAGCTGCTTC  | Creating and confirming the Δ4759 mutation                   |
| SVEN4759<br>Up      | TCCGGTACGTGTGTTAACGG                                            | Confirming the Δ4759 mutation                                |
| SVEN4759<br>Down    | GGGATCATCTGGAGCAGTCG                                            | Confirming the Δ4759 mutation                                |
| SVEN4759 In         | CGGCGTTGATCATCTCCAGC                                            | Confirming the Δ4759 mutation                                |
| SVEN2570-73<br>Fwd  | TCCCTCACCCCTCTCTGCTGTCCGGAGGCCCCC<br>CACATGATTCCGGGGATCCGTCGACC | Creating and confirming the Δ2570-73 ( <i>des</i> ) mutation |
| SVEN2570-73<br>Rev  | CGTACTCCGGCGGGGCTCGCATCGGTCTCGGG<br>GGGGTTATGTAGGCTGGAGCTGCTTC  | Creating and confirming the Δ2570-73 ( <i>des</i> ) mutation |
| SVEN2570-73<br>Up   | ATATTCTAGAGACGAGACGCAGGAAGACGC                                  | Confirming the Δ2570-73 ( <i>des</i> ) mutation              |
| SVEN2570-73<br>Down | GTTCGACGCCCTGGACATCG                                            | Confirming the Δ2570-73 ( <i>des</i> ) mutation              |
| SVEN2570-73<br>In   | ATATTCTAGACACACCGGTGAACGGTCCTC                                  | Confirming the Δ2570-73 ( <i>des</i> ) mutation              |

|                 |                                              |                                                                                                                                          |
|-----------------|----------------------------------------------|------------------------------------------------------------------------------------------------------------------------------------------|
| SVEN5151 Up     | ATATGGTACCACTTCGCCCCGCTACTACACG              | Creating and confirming the $\Delta 5151$ mutation                                                                                       |
| SVEN 5151 Down  | ATATTCTAGAGGTGAAGGGCAGGTAGACCG               | Creating and confirming the $\Delta 5151$ mutation                                                                                       |
| SVEN5151 CheckF | CAACGCCTCCGACAAGAAGG                         | Confirming the $\Delta 5151$ mutation                                                                                                    |
| SVEN5151 CheckR | CTGCTTGCCGACGAACATCG                         | Confirming the $\Delta 5151$ mutation                                                                                                    |
| blaF            | CCCTGATAAATGCTTCAATAATATTGAAAAA<br>GGAAGAGTA | Amplifying the <i>hyg-oriT</i> and <i>vio-oriT</i> cassettes; cosmid-based complementation of the $\Delta 4759\Delta 5151$ mutant strain |
| blaR            | AATCAATCTAAAGTATATATGAGTAACTTG<br>GTCTGACAG  | Amplifying the <i>hyg-oriT</i> and <i>vio-oriT</i> cassette; cosmid-based complementation of the $\Delta 4759\Delta 5151$ mutant strain  |
| HrdBF           | CCGTTTCCATCGTTCCGAGA                         | Semi-quantitative RT-PCR                                                                                                                 |
| HrdBR           | ATCTGCCCATCAGCCTTTCC                         | Semi-quantitative RT-PCR                                                                                                                 |
| 0164F           | GTGTCGTTCTCCTGGCCGG                          | Semi-quantitative RT-PCR                                                                                                                 |
| 0164R           | GTTGTCCGCGACGACGGTG                          | Semi-quantitative RT-PCR                                                                                                                 |
| 0512F           | TGATGACCCTCGTCAATCGG                         | Semi-quantitative RT-PCR                                                                                                                 |
| 0512R           | CAACAATGCCTCCCAGGACC                         | Semi-quantitative RT-PCR                                                                                                                 |
| 0517F           | CTGCACGCGGAGGAGTACG                          | Semi-quantitative RT-PCR                                                                                                                 |
| 0517R           | GAGCAGATAGGCCGCTGC                           | Semi-quantitative RT-PCR                                                                                                                 |
| 0777F           | GTCGTCGAGCACCTCATCG                          | Semi-quantitative RT-PCR                                                                                                                 |
| 0777R           | CCTTGGGCTCGTTCTTCAGC                         | Semi-quantitative RT-PCR                                                                                                                 |
| 1955F           | TGCACCGAGAAGAGCGACG                          | Semi-quantitative RT-PCR                                                                                                                 |
| 1955R           | CGGCGAGGTTACGTGACC                           | Semi-quantitative RT-PCR                                                                                                                 |
| 1997F           | GAGGAGGCGACGGAGGATCC                         | Semi-quantitative RT-PCR                                                                                                                 |
| 1997R           | GCGTCGCCGAAGTCCTTGC                          | Semi-quantitative RT-PCR                                                                                                                 |
| 2568F           | GAGATCGTCCGCGAGATGG                          | Semi-quantitative RT-PCR                                                                                                                 |
| 2568R           | GAGATCGTCCGCGAGATGG                          | Semi-quantitative RT-PCR                                                                                                                 |
| 2570F           | CCGTTACCGGTGTGACCC                           | Semi-quantitative RT-PCR                                                                                                                 |
| 2570R           | GGAGGTAGACGCTCTCCAGC                         | Semi-quantitative RT-PCR                                                                                                                 |
| 4765F           | CATCGTGAGTTCTCGTGGG                          | Semi-quantitative RT-PCR                                                                                                                 |
| 4765R           | GTCGTAAGTCTTGAGACCCC                         | Semi-quantitative RT-PCR                                                                                                                 |
| 4820F           | GCTGACCGTCTCAACACCG                          | Semi-quantitative RT-PCR                                                                                                                 |
| 4820R           | TGAGCGTACGGAAGACGAGG                         | Semi-quantitative RT-PCR                                                                                                                 |
| 5373F           | TGGCCTACGAGTACCTACC                          | Semi-quantitative RT-PCR                                                                                                                 |
| 5373R           | GTCCACGTCAGCTTGCCG                           | Semi-quantitative RT-PCR                                                                                                                 |
| 5419F           | ACCGAGTCCCGACGGATCC                          | Semi-quantitative RT-PCR                                                                                                                 |
| 5419R           | CCTCCCGTCCACAGCTCGG                          | Semi-quantitative RT-PCR                                                                                                                 |
| 5424F           | AGGTGATCTCCACGGATCG                          | Semi-quantitative RT-PCR                                                                                                                 |
| 5424R           | CGTCAGGGTCGTCTTACCG                          | Semi-quantitative RT-PCR                                                                                                                 |
| 0164F           | GTGTCGTTCTCCTGGCCGG                          | Semi-quantitative RT-PCR                                                                                                                 |

|       |                       |                          |
|-------|-----------------------|--------------------------|
| 0164R | GTTGTCCGCGACGACGGTG   | Semi-quantitative RT-PCR |
| 5475F | CAGCCGGGTACCACCGTCC   | Semi-quantitative RT-PCR |
| 5475R | GTACTGCGGGCCGGATAGG   | Semi-quantitative RT-PCR |
| 5479F | CGCCATGAATGACGCAAGC   | Semi-quantitative RT-PCR |
| 5479R | GGTGAGACCGGAGCTGTCTG  | Semi-quantitative RT-PCR |
| 6981F | AAGGATTCCGCGGTCTGTCG  |                          |
| 6981R | GCTTGAGCTTCATGTCGGCG  |                          |
| 7057F | GTCACCGCCCACTTCTTCG   | Semi-quantitative RT-PCR |
| 7057R | CCTTGAGGAAGGACACCTGC  | Semi-quantitative RT-PCR |
| 7058F | CGGCGGGACCGAGAAGTCC   | Semi-quantitative RT-PCR |
| 7058R | CCGTACTTGTGCTCGACGG   | Semi-quantitative RT-PCR |
| 7063F | TCGTTGTCCGTCTGAATCCCG | Semi-quantitative RT-PCR |
| 7063R | CAGGCCTAAGCCCCGGTACG  | Semi-quantitative RT-PCR |
| 7098F | GCTCGTACCAGCTCTCCGC   | Semi-quantitative RT-PCR |
| 7098R | GGATCGTGTTCTGCGGGTAG  | Semi-quantitative RT-PCR |
| 7139F | CGCCCGGAACGGAAAGAACC  | Semi-quantitative RT-PCR |
| 7139R | AGTCCTGGTTGGACAGGACG  | Semi-quantitative RT-PCR |
| 7154F | CTTCACCTGGTCGCTGTACG  | Semi-quantitative RT-PCR |
| 7154R | TTCGATCCTCAGGTCGGGGG  | Semi-quantitative RT-PCR |

629

630

# Figure captions

**Fig. 1. Iron availability impacts the growth and survival of bacteria and fungi. A.** Quantification of colony forming units (CFU) for *B. subtilis* and *M. luteus* on LB agar medium and *S. cerevisiae* on YPD agar medium, supplemented with 0, 160 or 320  $\mu$ M 2,2'-dipyridyl. Plates were incubated for 48 h. All values represent the mean  $\pm$  standard error for three or four biological replicates. Asterisks indicate statistically significant differences (\*: *p*-values of 0.05 to 0.01; \*\*: *p*-values of 0.01 to 0.005; \*\*\*: *p*-values below 0.005, NS: no significant difference) as determined by a student's t-test. Note that *M. luteus* and *S. cerevisiae* did not grow at 320  $\mu$ M 2,2'-dipyridyl. **B.** Growth curves of *B. subtilis* and *M. luteus* in liquid LB medium and *S. cerevisiae* in liquid YPD medium, supplemented with 0, 160 or 320  $\mu$ M 2,2'-dipyridyl and grown for 8 h. Values represent the mean  $\pm$  standard error for three biological replicates.

**Fig. 2. Iron supplementation restores the growth of microbes exposed to VOCs. A.** Schematic of the experiment performed in **B:** Plates comprising uninoculated (blank) YP, *S. venezuelae* exploring on YP, or non-exploring *S. venezuelae* on YPD, were incubated in smaller dishes for 10 days. After 10 days, an indicator strain (*B. subtilis*, *M. luteus*, or *S. cerevisiae*) was spread on medium (+/- 1 mM FeCl<sub>3</sub> supplementation) in the outside dish. **B.** Quantification of *B. subtilis*, *M. luteus*, or *S. cerevisiae* colonies on medium with or without FeCl<sub>3</sub> supplementation, following growth adjacent to exploring *S. venezuelae*, non-exploring *S. venezuelae*, or uninoculated medium **C.** Experiment conducted as in A and B, only with H<sub>2</sub>O or TMA solutions replacing YP/YPD inoculated with *S. venezuelae*. Plates were incubated at room temperature for 2 days. *B. subtilis*, *M. luteus*, or *S. cerevisiae* colonies were quantified following growth on medium with or without FeCl<sub>3</sub> supplementation, adjacent to H<sub>2</sub>O or TMA solutions. For **B** and **C:** Values represent the mean  $\pm$  standard error for three or four replicates, and statistical significance was determined using one-way analysis of variance (ANOVA), followed by Tukey's multiple comparison test. Asterisks (\*) indicate *p*-values (\*\*: *p*-value of 0.01 to 0.005; \*\*\*: *p*-value below 0.005).

**Fig. 3. Explorer cells produce desferrioxamines. A-D** show accurate mass fragmentation (MS<sup>2</sup>) data and molecular structures of associated ferrioxamine (iron-complexed desferrioxamine) compounds. No (des)ferrioxamines could be detected from non-exploring cultures (*S. venezuelae*

662 spread on YPD). **A.** Aryl-ferrioxamine, from *S. venezuelae* exploring on YP and *S. venezuelae*  
663 exploring beside *S. cerevisiae* on YPD. **B.** Ferrioxamine D1, from *S. venezuelae* exploring on YP and  
664 *S. venezuelae* exploring beside *S. cerevisiae* on YPD. **C.** Ferrioxamine B, from *S. venezuelae*  
665 exploring on YP and *S. venezuelae* exploring beside *S. cerevisiae* on YPD. **D.** Ferrioxamine B + CH<sub>2</sub>  
666 (where the CH<sub>2</sub> is depicted as an ethyl group, as the methylene addition is on the right-hand  
667 side of the molecule and is most likely located in the acyl tail) from *S. venezuelae* exploring  
668 beside *S. cerevisiae* on YPD. **E.** Normalized transcript levels for genes in the *S. venezuelae*  
669 desferrioxamine biosynthetic cluster (as defined by antiSMASH (23)) in explorer cells, divided by  
670 those for non-exploring cells. The associated gene names or *sven* gene numbers are shown  
671 below each gene.

672

673 **Fig. 4. Upregulation of two gene clusters associated with siderophore transport in explorer**  
674 **cells.** **A.** Normalized transcript levels for *S. venezuelae* clusters homologous to the *S. coelicolor*  
675 *bldKABCDE* locus, where normalized transcript levels in *S. venezuelae* explorer cells were  
676 divided by those in non-exploring cells. The associated *sven* gene numbers are shown below each  
677 cluster, and asterisks beside gene numbers indicate that there are genes in the cluster that are  
678 significantly differentially expressed in exploring versus non-exploring cultures, based on  
679 calculated *q*-values. **B.** Organization of the *S. coelicolor* *bldK* locus and the two *S. venezuelae*  
680 *bldK*-like clusters that are significantly and highly differentially expressed in exploring versus non-  
681 exploring cultures.

682

683 **Fig. 5. Iron uptake capabilities impact exploration.** **A.** Wild type *S. venezuelae* exploring on YP  
684 with 0, 160 or 320  $\mu$ M dipyriddy, alongside the *desABCD* mutant and the  $\Delta$ *sven\_4759* $\Delta$ *sven\_5151*  
685 double mutant growing on YP agar medium. Plates were incubated for 10 days. Images are  
686 representative of three replicates per strain and dipyriddy concentration (where appropriate) **B.**  
687 Quantification of colony expansion by wild type *S. venezuelae*, the *desABCD* mutant, and the  
688  $\Delta$ *sven\_4759* $\Delta$ *sven\_5151* double mutant on YP agar, with 0-320  $\mu$ M dipyriddy for wild type. Values  
689 represent the mean  $\pm$  standard error for three replicates. **C and D.** Semi-quantitative RT-PCR  
690 using RNA isolated from wild type,  $\Delta$ *desABCD* and  $\Delta$ *sven\_4759* $\Delta$ *sven\_5151* double mutant strains  
691 grown for 8 days on YP medium. The vegetative sigma factor *hrdB* served as a positive control  
692 for RNA loading and RNA integrity, and no-RT reactions (using RNA as template with *hrdB*-specific

primers) were included as negative controls to ensure a lack of DNA contamination of RNA samples and all PCR reagents. The number of PCR amplification cycles was optimized to ensure products were in the linear amplification range, and that no products were observed in the negative control for each reaction. For C, 30 cycles were conducted for all reactions apart from *hrdB*, where 27 cycles were used. Cycle numbers are shown to the left in panel D. Representative results are shown for experiments conducted in biological duplicate and technical triplicate. E. Growth curves of wild type *S. venezuelae* grown in liquid YP medium with 0-320  $\mu$ M dipyridyl over 15 h. Values represent the mean  $\pm$  standard error for three replicates.

**Fig. 6. New interspecies interactions alter exploration by creating low iron environments.** A. *S. venezuelae* grown alone (top row) or beside *A. orientalis* sp. *lurida* on YP supplemented with FeCl<sub>3</sub> or dipyridyl. Plates were incubated for 7 days, and all images are representative of three replicates per condition. B. Quantification of *S. venezuelae* grown alone or beside *A. orientalis* on YP agar with decreasing levels of available iron (left to right). All values represent the mean  $\pm$  standard error for three or four replicates. Asterisks indicate statistically significant differences (\*: *p*-value 0.05 to 0.01; \*\*\*: *p*-values below 0.005, NS: no significant difference) as determined by a student's t-test.

**Fig. 7. *S. venezuelae* growth on medium supplemented with iron.** Wild type *S. venezuelae* grown on YP medium (top row; exploration-promoting) or MYM medium (bottom row; classic growth medium) supplemented with 0-10,000  $\mu$ M FeCl<sub>3</sub>. Images are representative of three replicates per media type, per iron concentration.

**Fig. 8 *S. venezuelae* explorer cells thrive and kill other microbes in alkaline, low-iron environments.** 1. *S. venezuelae* exploration is triggered by a combination of low glucose and high amino acid concentrations. 2. Explorer cells release the VOC TMA into the surrounding environment. 3. TMA raises the pH of the environment, concomitantly reducing the solubility and bioavailability of iron. 4. To cope with low iron conditions, *S. venezuelae* explorer cells release desferrioxamines. These siderophores return solubilized iron to the cells. At the same time, *S. venezuelae* exploration is enhanced, perhaps as a mechanism to reach more iron-rich environments. This enhancement of exploration leads to increased TMA production, creating a



positive feedback loop (orange arrow): TMA depletes iron, explorer cells spread to get more iron, TMA production continues, and the cycle repeats. Within these alkaline, iron-depleted environments, the growth of other bacteria and fungi is reduced.

## Supplementary Figure Captions

**Fig. S1. Exploring *S. venezuelae* creates an alkaline environment through the release of volatile compounds.** A smaller dish containing YP medium (left) or YP inoculated with *S. venezuelae* (right) was incubated within a larger dish containing LB medium. After 10 days, when *Streptomyces venezuelae* exploration was well-underway, bromothymol blue pH indicator dye was spread on the larger agar. Blue indicates VOC-induced alkalinity.

**Fig. S2. Organization of the desferrioxamine biosynthetic cluster and its control by DesR/DmdR.** **A.** The desferrioxamine biosynthetic clusters, with gene names and associated *sven* numbers shown below each gene. Promoter locations are shown as black arrows. , and colours indicate predicted gene function. Promoter locations are shown as black arrows. Promoter region upstream of *desA* is indicated with a box in the cluster diagram, and the sequence is shown below with the predicted DesR/DmdR binding site highlighted in grey. **B.** Alignment of the promoter regions for *desA* in *S. coelicolor* (top) and *S. venezuelae* (bottom). **C.** Alignment of the DesR/DmdR regulators from *S. coelicolor* (SCO4394) and *S. venezuelae* (SVEN\_4209).

**Fig. S3. Mutations within individual *bldK*-like gene clusters do not impact exploration.** Wild type *S. venezuelae*,  $\Delta sven_{4759}$  and  $\Delta sven_{5151}$  grown on YP medium. Plates were incubated for 10 days. Images are representative of three replicates per strain per condition.

**Fig. S4. Complementation of the double *bldK* mutant.** Wild type *S. venezuelae*, the double *bldK* mutant, and the double *bldK* mutant complemented with a cosmid carrying the wild type sequence of *sven\_4759* were grown on YP medium for 10 days.

**Fig. S5. Expression profiles of genes involved in siderophore synthesis and iron uptake.** Semi-quantitative RT-PCR using RNA isolated from wild type, *desABCD* mutant, and

755  $\Delta sven\_4759\Delta sven\_5151$  double mutant strains grown for 8 days on YP medium. The vegetative  
 756 sigma factor *hrdB* served as a positive control for RNA loading and RNA integrity, and no-RT  
 757 reactions (using RNA as template with *hrdB*-specific primers) were included as negative controls to  
 758 ensure a lack of DNA contamination of RNA samples and all PCR reagents. Representative results  
 759 are shown for experiments conducted in biological duplicate and technical triplicate.

760

761 **Fig. S6. *Amycolatopsis* inhibits aerial hyphae formation by *S. coelicolor*.** Left: *S. coelicolor*  
 762 grown alone. White colony areas are aerial hyphae. Right: *S. coelicolor* grown beside  
 763 *Amycolatopsis orientalis* sp. *lurida*. Shown are two replicates per plate, with both plates  
 764 having been incubated for 14 days.

765

766 **Fig. S7. Glucose represses exploration, even in the presence of low iron.** Wild type *S.*  
 767 *venezuelae* and the  $\Delta sven\_5759\Delta sven\_5151$  mutant strain grown on 0 or 160  $\mu$ M 2,2'-dipyridyl. Two  
 768 replicates of each strain were spotted on each plate, and strains were incubated for 10 days.

769

A

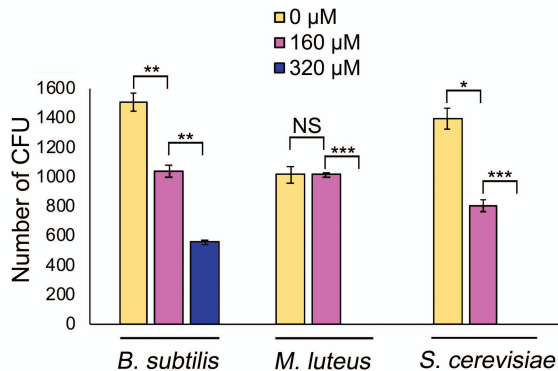

B

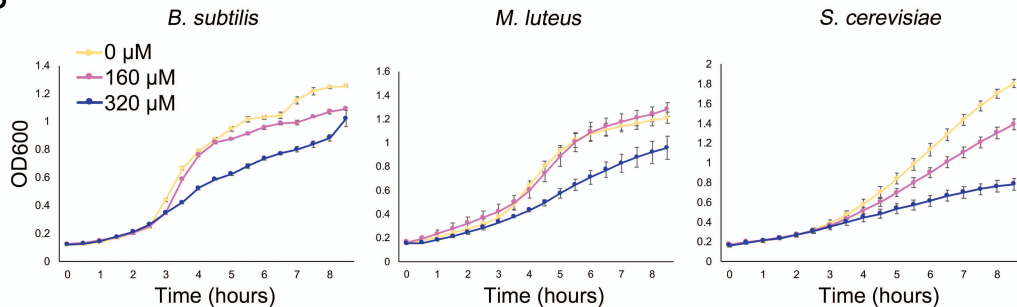

A

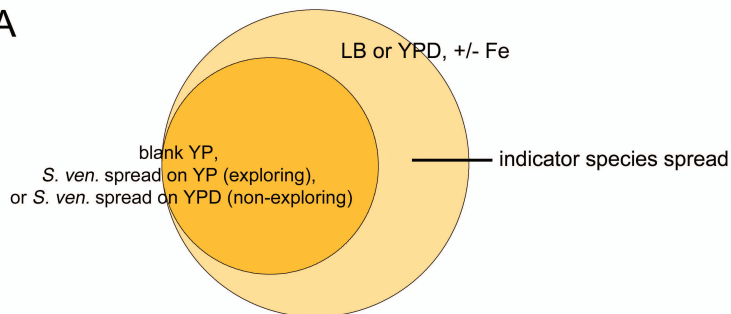

B

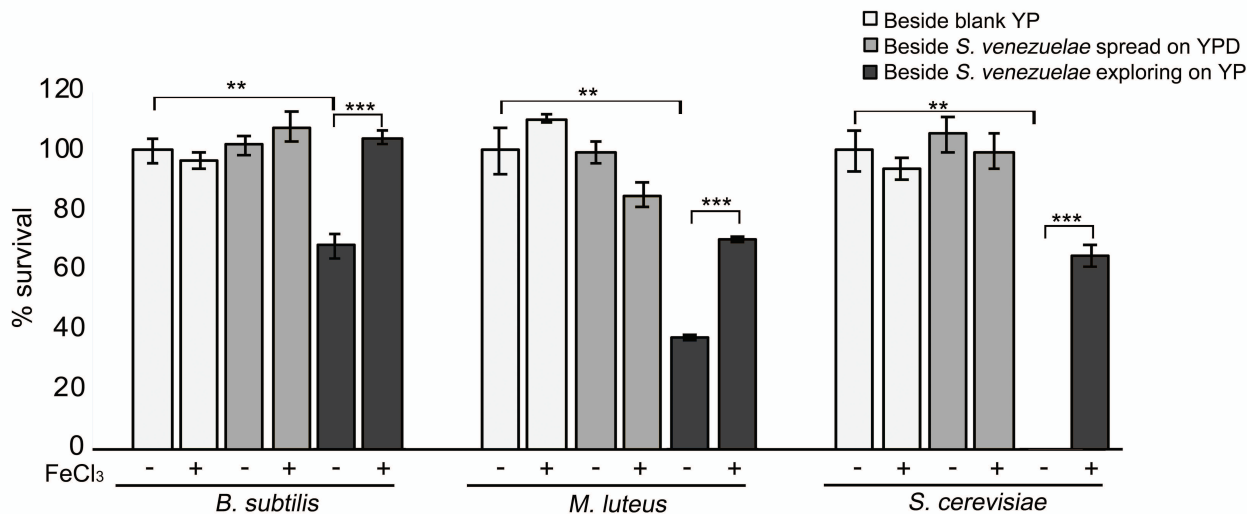

C

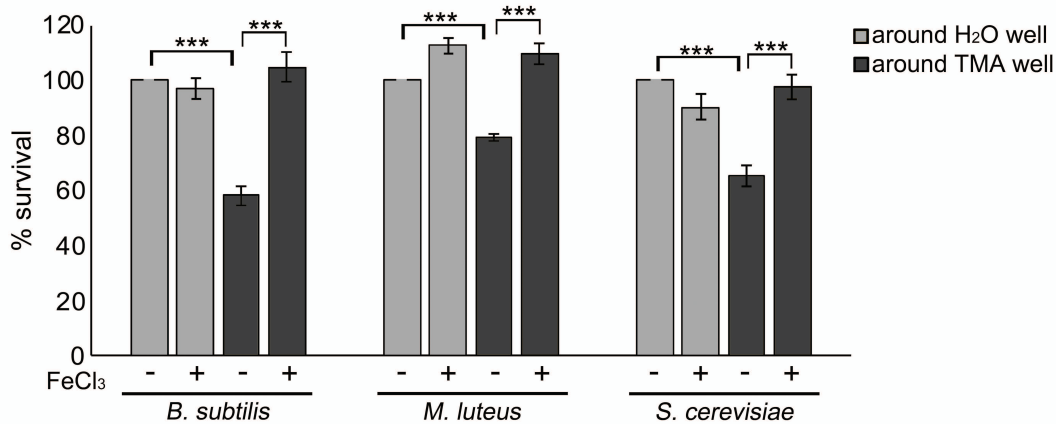

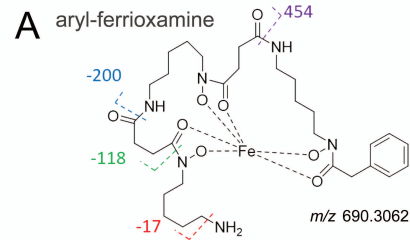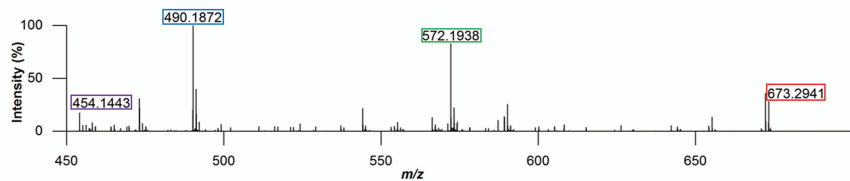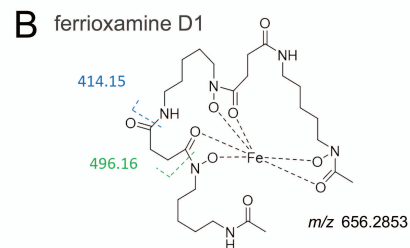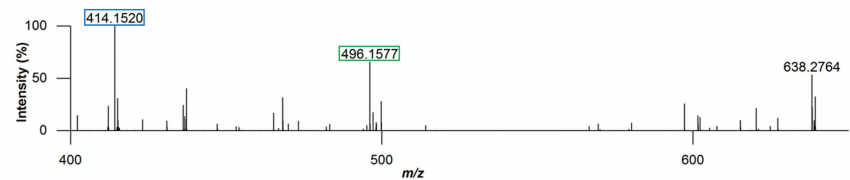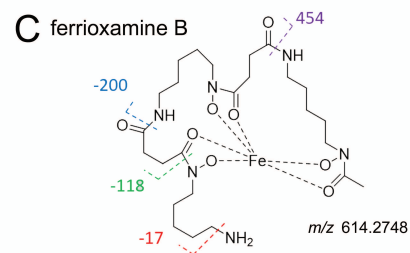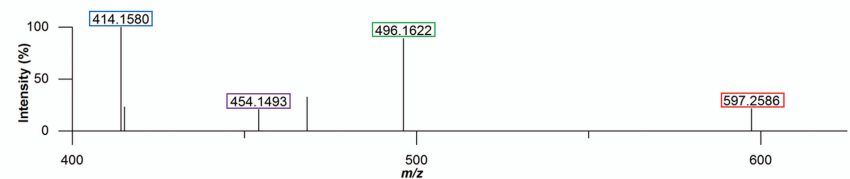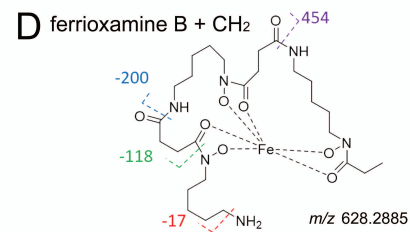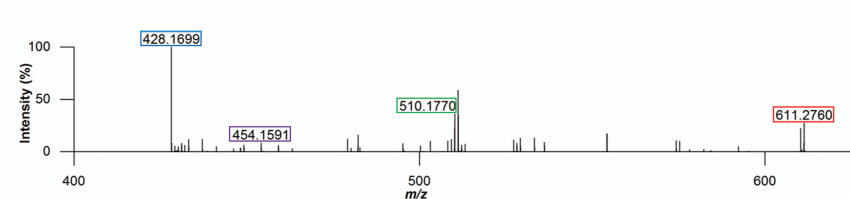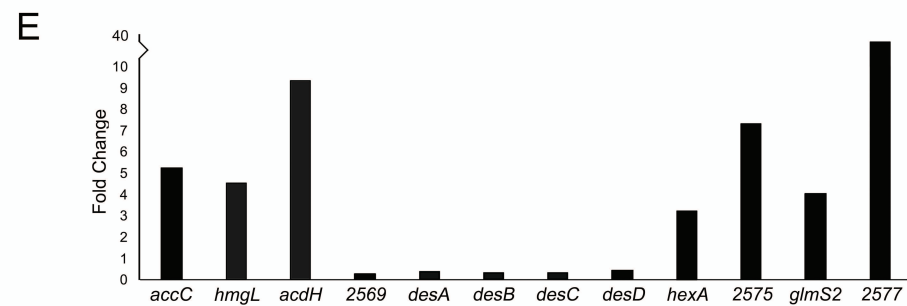

A

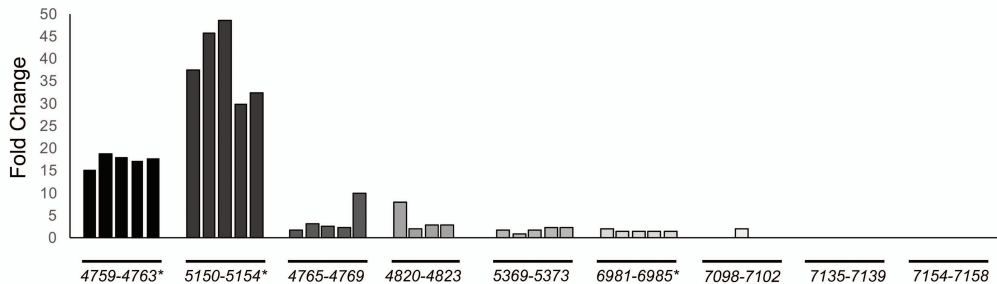

B

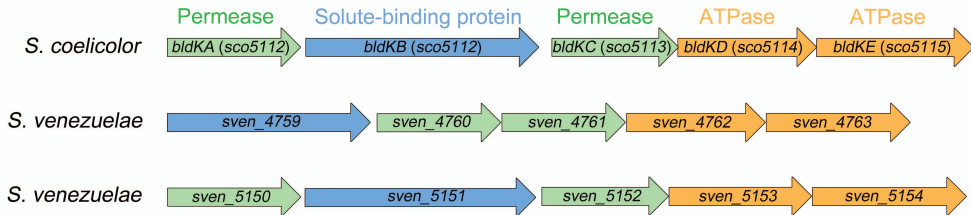

**A**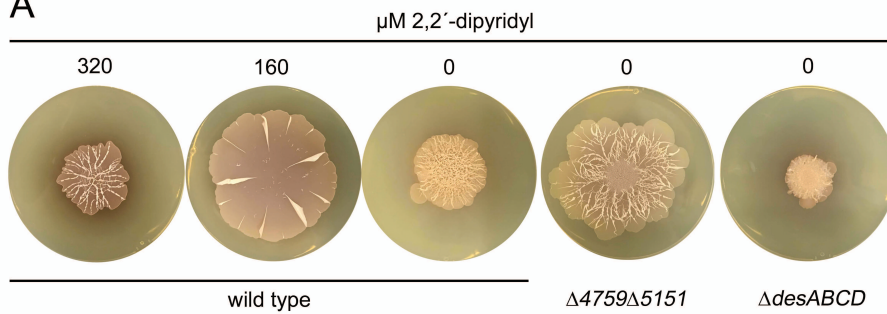**B**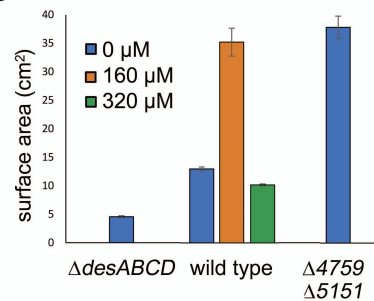**C**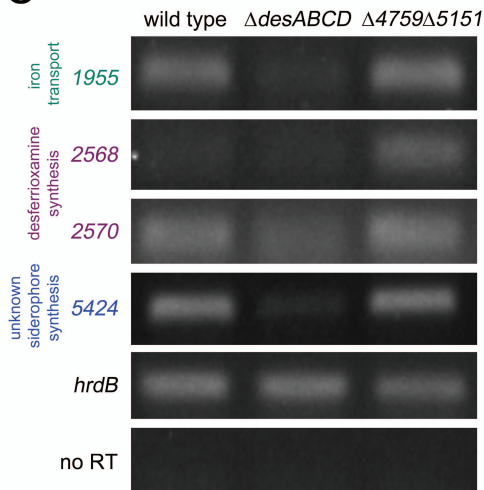**D**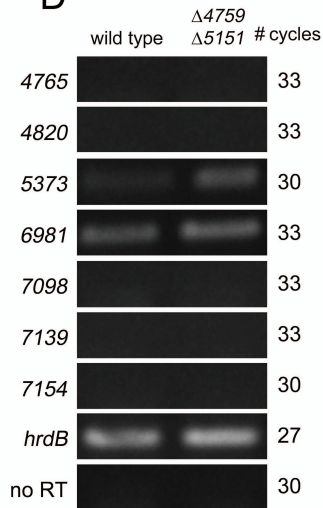**E**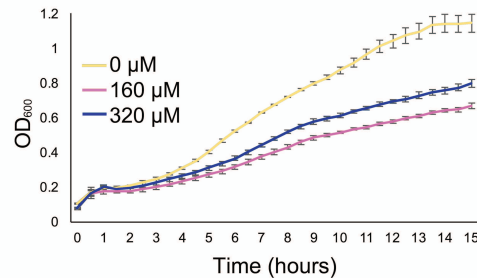

A

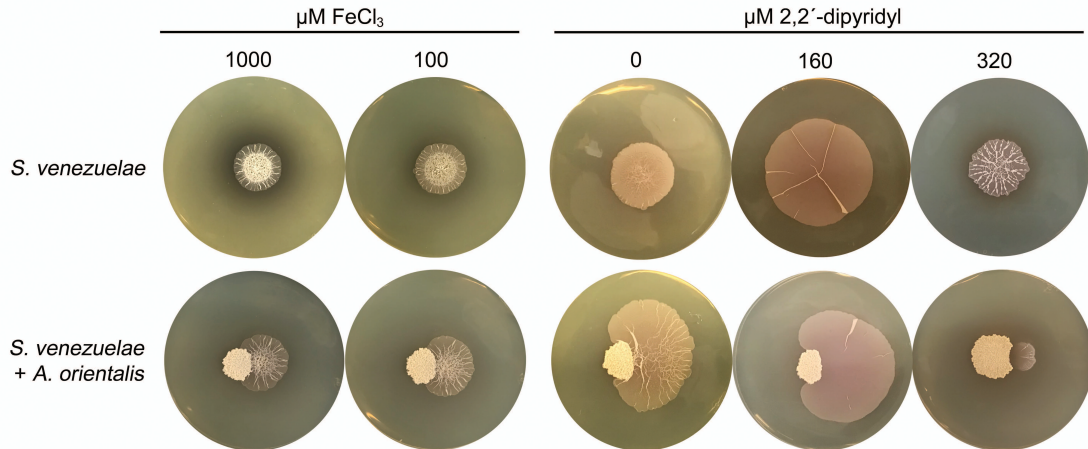

B

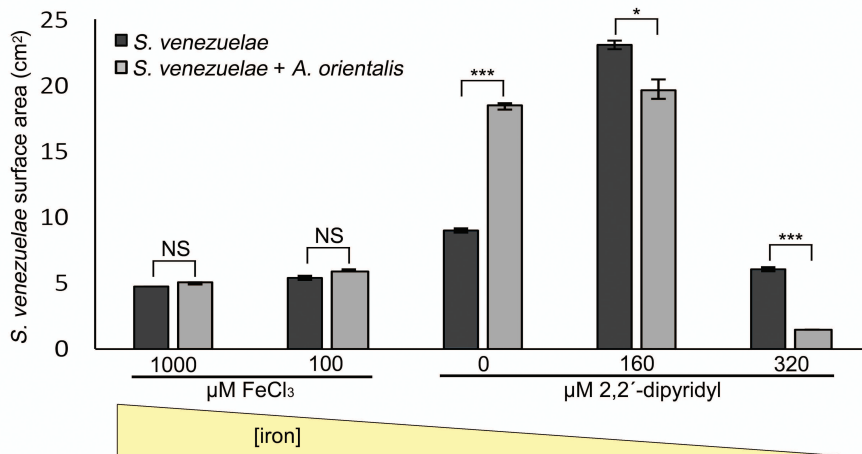



$\mu\text{M FeCl}_3$

0

100

500

5000

10 000

YP  
(exploration)

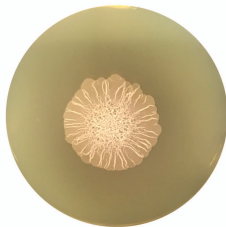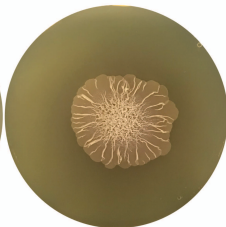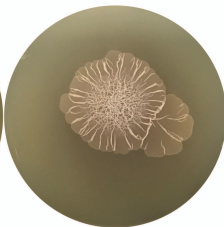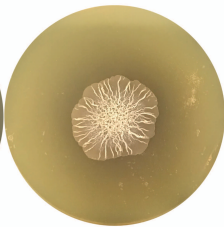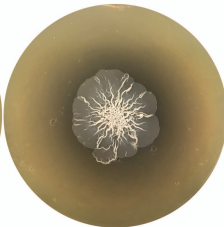

MYM  
(classic  
development)

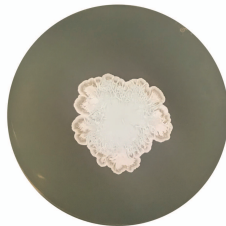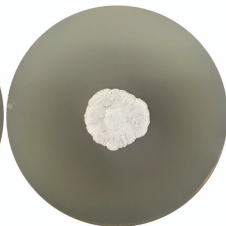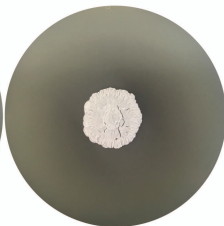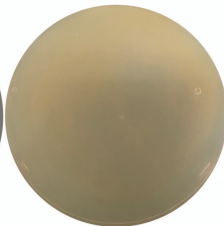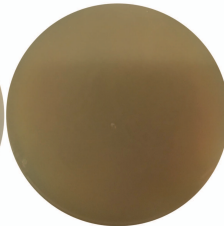

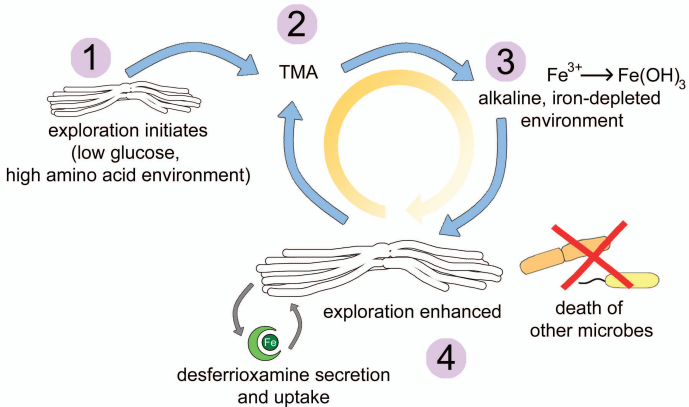

Source: https://www.biorxiv.org/content/10.1101/396606v1.full.pdf
